# Supplementary material for: A Fast Surrogate Model for 3D-Earth Glacial Isostatic Adjustment using Tensorflow (v2.8.10) Artificial Neural Networks
Source: Copernicus journal article supplement (doi:10.5194/egusphere-2023-2491), 2023-11-02
Supplement: Supplementary file [file egusphere-2023-2491-AC2-supplement.zip]

## Reviewer 2

Firstly we would like to thank the Dr. W. van der Wal for the time they have taken to read through the manuscript and make their suggestions. We will take their comments in the supplemental PDF into consideration, and as requested will not provide specific rebuttals here. An itemized set of responses to their main comments is below, presented in the same order as the reviewer has provided. We note that some modifications requested by the reviewer are implemented in the annotated PDF of the manuscript provided by the reviewer (included).

### Main comments

1. *The first application of neural network to emulate a GIA model as far as I know is Lin et al. (2023), which has been published since September 2023 and presented at AGU Fall meeting in 2022. That does not take away any of the scientific value of the current manuscript but Lin et al. (2023) should be discussed in some detail, e.g. , in terms of type of neural network selected, time steps, loss function, but also because it uses many different ice histories which the current manuscript states as important future work (of course Lin et al did not use 3D GIA models).*

We were aware Yucheng Lin and colleagues at Durham University were working on the application of Machine Learning to glacial isostatic adjustment (GIA) modelling. In fact, we had some discussions with these colleagues to share ideas and make sure our contributions would be complementary. However, at the time we submitted of our manuscript to GMD, we were not aware that the Lin et al. paper had been published, hence the reason it is not mentioned. We will revise our manuscript to mention the Lin et al study in the Introduction and describe how it is complementary to our work. The different goals of the Lin et al. study to ours is also reflected in the type of emulator used (graphical vs non-graphical) as well as other methodological aspects that will be noted in the Introduction. Finally, we will compare our emulation results to those of Lin et al. where appropriate in Section 3.1 (Results).

2. *335-355: this part of the paper is separate from the main goal of the paper and the emulator does not seem necessary for it. I think it can be removed without any loss for the main objective. If the authors have a strong wish to keep this part, the results and conclusions need to be placed in context with a long list of earlier studies that have reached similar conclusions as in line 338, 348 and 353. The extra research goal should be introduced in more detail compared to what is now in line 70-72, including previous work and what the current paper adds to it, and the conclusion in line 389 should also state that the conclusions are in agreement with many earlier studies.*

We agree that this aspect of the analysis is secondary to the primary aims. However, a key motivation for better searching the 3D Earth model parameter space is to (eventually) demonstrate that 3D models do produce improved fits compared to the 1D Earth models. This is the rationale for including this component of the analysis. Although the results are disappointing, in that the more thorough exploration of parameter space did not result in markedly improved fits relative to the 1D case, we prefer to keep this aspect of our study. Therefore, the text will be revised by: (1) expanding the Introduction to make this research goal more explicit and to provide a short review of past work that has compared data-model fits with 3D and 1D Earth models; and (2) referring to past work to ensure appropriate credit is given in Section 3.2 when discussing the results. Prior to submission of the revised manuscript, we will inform Dr. van der Wal of the detailed edits to ensure no important studies have been overlooked.

3. *I found the description of the method sometimes lacking in detail. As the first application of neural networks to a 3D GIA model the it will be followed up by other studies. For that reason it is important know what has been tried and why certain choices are made. Especially I would say in a journal such as GMD. Below are specific comments. I think none of them requires extra modelling.*

We agree that more detail on these aspects is warranted and so will significantly expand the Methods section (particularly 2.2 and 2.3). More details on these revisions are outlined below.

*104: this difference should be quantified because it is a source of error that will contribute to the difference between emulated and explicit results, since the emulation is based on the 3D model but the result is added to the NMSS model.*

In fact, we chose to calculate the 3D minus 1D signal using the Seakon code only (run in 1D and 3D configurations) to avoid any potential errors due to differences between these two codes. This choice meant a greater computational requirement of generating output for 330 (1D) model parameter sets using the Seakon code instead of the NMSS code. However, it negates the need to benchmark the NMSS and Seakon codes. We will clarify this aspect of the analysis in Sections 2.1 and 2.2 and remove the sentence “When lateral variations are not included, Seakon model output is equivalent to the NMSS model (assuming parameter values corresponding to the 3-layer viscosity structure are the same).” as it is not relevant to the analysis and led to confusion for both reviewers.

*134 and further: The text here is hard to grasp. Testing and comparison is not specific enough, and the proxy-data: model comparison is not explained yet. With neural networks it is good to be clear about what tests and validation are done. In line 232 it is now not clear what the validation subensemble is.*

We have modified the specified section of text in the PDF for clarity. We will add text to extend the explanation with regards to the generation of the testing and validation datasets to further increase clarity.

*145-147: This is an important finding, and for future development of ANN it is very useful to know why RSL itself can not be accurately emulated, and whether this is worthy of further research or not. Other questions: How is the ROC computed, the difference between two consecutive timesteps? How is RSL later reconstructed from this, by integrating the emulated ROC over time? It would be helpful to provide an indication of some of the preliminary results.*

We agree this is an interesting and important question worthy of further investigation. Our work does not address why the 3D-SS ROC of RSL is able to be more accurately emulated compared to 3D-SS RSL itself. We were disappointed in the results for RSL and so considered ROC of RSL and found the results to be significantly improved and, therefore, worthy of publication. As well, we note that there is no easy way to directly ensure that  $RSL(PD) = 0$  as per the definition of RSL, and therefore a data transformation, such as was used in the manuscript, is appropriate.

We will revisit our preliminary results that focused on RSL (rather than ROC RSL) and, if they are compatible with the current structure of the experiments described in the manuscript, we will incorporate additional information to at least document the improvement in going from RSL to ROC of RSL. Future work will expand on the results presented in this manuscript in several respects and we hope to explain the relative success of the ROC results as part of that analysis and potentially explore other functional transformations. With respect to how ROC was calculated, it is as the reviewer suggests and is simply the difference between RSL over consecutive timesteps divided by the time interval, though we do note that the size of

the timestep varies throughout the glacial cycle (from 500 to 2000 years). The reviewer is also correct with regards to the reconstruction of RSL via integration.

*154: It is not clear to me how the probability density function is created, could you clarify this? Should this be seen as a histogram of all ROC for all timesteps or per timestep?*

We will add additional details regarding the construction of the probability density function (PDF). The PDF can be thought of as the histogram of the ROC of RSL across all variables and for all timesteps.

*164: Can you provide some insight on why you selected this library?*

The Tensorflow library/framework was chosen for several reasons. However, a primary one was the support for this specific library at the Digital Research Alliance of Canada (formerly ComputeCanada) platform where the training and model execution was conducted. The Keras application programming interface also made the implementation of the neural networks themselves simple (both from the perspective of the authors as ‘developers’ and readers as ‘users’). We expect that comparable results can be obtained from other libraries/frameworks such as PyTorch.

*165: “we train separately”. Doesn’t this result in a different ANN (different weights) for each ice history, viscosity, lithosphere thickness? I might miss something obvious but it would be good to clarify.*

It results in a different set of weights for each 3D configuration (i.e., lithosphere model and seismic velocity model) so, in this study, three sets of weights were determined (for each of the 3D model configurations defined in Section 2.2). This will be mentioned explicitly in the text in Section 2.2.

*169: Can you explain why 4 time steps is a good choice? It is not intuitive as the “memory” of GIA would go back further than that, and the paper later concludes that it could be a reason for the worse performance for present-day uplift rates.*

As with the structure of the neural networks, this choice was the result of preliminary testing and evaluating trade-offs with respect to hardware limitations and quality of predictions. Generally, providing more previous timesteps to the networks resulted in reduced misfits, but there were swiftly diminishing returns and technical issues (largely due to memory and storage constraints on the hardware used for training) with adding significantly more past time-step data. Four previous timesteps were found to be a useful balance between model expense and useful predictions.

With regards to this being a potential source for poor performance regarding present-day uplift rates: this statement in the conclusions would benefit from additional clarity. While technically true, we would have to incorporate at least ~10,000 years of timesteps (~20) before providing multiple non-zero ice thickness changes between timesteps for many locations. This is beyond what we are able to evaluate with the hardware accessible to us, and would also still only provide a small subset of ice thickness data which is not constant. As such, a different approach for providing ice history for predictions of 3D-SS differences in present-day uplift rates needs to be explored in future work.

We will incorporate a brief summary the above with respect to the choice of 4-timesteps and rephrase the text in the Conclusions to increase clarity.

*174: Can you specify it here? This is now done in line 214. From my experience the choice of stopping condition can be important. Please explain if you have tried other stopping criteria, for example averaging only over locations with significant signal (and compare to Lin et al).*

We will add details regarding the stopping criteria tested in the initial stages of the investigation. We did not investigate stopping criteria with a spatial dependence as the reviewer suggests. We will review the Lin et. al. manuscript for methodological comparisons on this aspect of the analysis and include relevant aspects in our discussion.

*183: Because the training expense and performance are the main results of the paper, can you give some insight in how these vary?*

We will add an overview of the initial results of our investigation into the impact of artificial neural network model structure.

*224: This is the first time the weights are mentioned. It would be good to mention these weights already in section 2.1 as I think these are the 'output' of the training.*

We will add in a description of the weights, specifically the interpretation of the first layer (which effectively maps the relative importance of each of the inputs) in Section 2. The reviewer specifies Section 2.1 (GIA/RSL Models), but given the material discussed in 2.2 (Generation of Model Training Inputs) and 2.3 (Training of the ANNs), these sections seem more appropriate for this subject matter and will be used instead.

*324: Could you add a conclusion or implication from the result in this paragraph? Do you think the ANN should not be used for intermediate field, or should N be increased?*

The intermediate field (globally not just for North America) is a difficult region to produce useful predictions of 3D-SS ROC RSL or ROC RAD via the ANNs employed. For the current work, and given the scale of misfits involved, it suggests that this approach (i.e., this specific selection of inputs to an ANN to produce estimates of 3D-SS ROC RSL or ROC RAD) should not be used to explore the intermediate field alone, but rather only as part of a spatially larger dataset as was done in the manuscript. Increasing N did not greatly improve fits in the intermediate field any more so than the near or far field. We will add a concluding sentence summarizing the above to the specified paragraph.

*328: "within 2 parameter value increments" In table 1 this does not appear to be the case for delta\_total for USGC: 0.05 for EMU and 0.8 for EXP. Can you check this?*

We have validated the data in Table 1 and the reviewer is correct: as such the statement is not valid given the results in Table 1, and so we will modify the text to reflect this.

#### *Miscellaneous comments*

*Caption figure 1. The lithosphere values shown are scaled, but the values in North America are above 200 km which is thick compared to other GIA studies. It would be good to comment on that in the text*

The lithosphere thickness values shown in Fig. 1 are not scaled. As stated in the caption, the values shown are those of the LithoRef18 model (Afonso et al., 2019). The actual scaling will vary depending on the target global value (for the 'reference' 1D viscosity profile). For most cases, the scaling is less than 1 and so the values shown in Fig. 1 are significantly reduced (by about 10-40%). Caption will be revised to improve clarity.

*Figure 2: There are a few apparent outliers for LT = 96 km, could you comment on those?*

We expect the outliers to come from one of two sources: (1) Potential issues with individual runs which comprise the datasets used to either train or validate the neural networks or (2) some unknown issue from the training of the ANNs themselves. With respect to (1), the Seakon code was not designed around ensemble scale work and requires at least 2 iterations produce a converged solution within tolerance. There have been multiple instances where model runs have failed unexpectedly (either due to internal software, or external hardware/computing-platform issues) but still produced output up to the point of

failure, thus resulting in a mixed-iteration dataset. While we have quality-checked these datasets to prune (i.e., re-run) those parameter vectors which stood out previously or produced errors during model execution, we will redo the parameter vectors the reviewer highlights in Figure 2. If the re-runs do not remove the outliers, then they must be due to (2) and we will document them as such.

*262: If this is correct, does that mean that the RSL anomaly is also relatively large for present? If you have these results it would be good to report on that to support your tentative conclusion*

The 3D-SS ROC of RSL emulator:model misfit would be large relative to the signal, as with the ROC RAD. However, these errors are only applicable over a relatively short duration and do not significantly impact the RSL predictions themselves. Indeed, this is also the case for the RAD predictions in the past (prior to ice disappearance in North America and Fennoscandia). However, as the text notes, this does render the emulator, as applied here, inaccurate for estimating contemporary land motion and also ROC RSL. Improving this is a target of ongoing work.

*332: It is a nice idea to use the emulator to find a larger area in the parameter space that can be searched with the explicit method, but what do you mean exactly by the "parameter space that provides the optimal fits". Is it the best fit parameters with a confidence region? How does it differ between EMU and EXP?*

This statement means the sub-area or (sub-areas) of the total LT-UMV-LMV parameter space that produce the lowest misfit values. For example, the approximate range UMV ( $0.1-0.3 \times 10^{21}$  Pas) and LMV ( $1-10 \times 10^{21}$  Pas) for the emulated model output in Fig. 6 (middle row). One could define this range to some degree of confidence using a statistical test (e.g., F-test), but we have not done this. As evident in Fig. 6, there are some differences between the emulated and explicitly modelling delta values (compare results in middle vs bottom frame). Given this, when using the results based on the emulator, it would be best to expand the boundaries of the sub-area by one or two increments in UMV and LMV to have greater confidence in finding the optimum parameter set via scaled-down search using the model (Seakon in this case).

Text will be revised and expanded to clarify these aspects.
